# Supplementary material for: Concurrent occurrence of electrochemical dissolution/deposition of cobalt–calcium phosphate composite
Source: Royal Society of Chemistry journal article supplement (doi:10.1039/d1ra05108c), 2021-01-01
Supplement: d1ra05108c3.pdf [file d1ra05108c3.pdf]

# Supporting information

## Concurrent Occurrence of Electrochemical Dissolution/Deposition of Cobalt-Calcium Phosphate Composite

Eunji Pyo,<sup>a</sup> Keunyoung Lee,<sup>a</sup> Gi-Tae Park,<sup>b</sup> Se-Young Ha,<sup>b</sup> Seonhong Lee,<sup>\*b</sup> Chung Soo Kim<sup>\*b</sup> and  
Ki-Young Kwon<sup>\*a</sup>

<sup>a</sup>Department of Chemistry, Gyeongsang National University and Research Institute for Green Energy Convergence Technology, Jinju,  
52828, South Korea

<sup>b</sup>Analysis & Certification Center, Korea Institute of Ceramic Engineering & Technology, Jinju, 52851, South Korea

## Experimental details:

**Materials.** Calcium nitrate tetrahydrate ( $\text{Ca}(\text{NO}_3)_2 \cdot 4\text{H}_2\text{O}$ , Duksan), sodium phosphate dibasic ( $\text{Na}_2\text{HPO}_4$ , Samchun, 99.0 %), cobalt nitrate hexahydrate ( $\text{Co}(\text{NO}_3)_2 \cdot 6\text{H}_2\text{O}$ , Daejung), potassium phosphate dibasic ( $\text{K}_2\text{HPO}_4$ , Sigma Aldrich, >98 %), potassium phosphate monobasic ( $\text{KH}_2\text{PO}_4$ , Sigma Aldrich) and Nafion 117 solution (Sigma Aldrich) were purchased and used without purification.

**Synthesis of Hydroxyapatite (HAP).** HAP was synthesized by a hydrothermal method under strong basic condition. 30 mmol  $\text{Na}_2\text{HPO}_4$  of 75 mL solution was added slowly for 10 minutes into 50 mmol  $\text{Ca}(\text{NO}_3)_2 \cdot 4\text{H}_2\text{O}$  of 45 mL solution during vigorously stirring, and followed by addition of 20 mL of 10 M NaOH solution. After stirring the solution mixtures for 30 minutes in room temperature, the white color solution was transferred into a Teflon-lined autoclave reactor and maintained in a heating oven at 200 °C for 24 h. After cooling the solution at ambient condition, white precipitate was washed three times using distilled water and centrifuged. Finally, HAP was obtained by freeze-drying overnight.

**HAP loaded on ITO glass.** ITO ( $2 \times 2 \text{ cm}^2$ ) was washed by sonicating in DI water, acetone and EtOH for 30 sec in each solvent and dried under Ar gas. HAP (5 mg), EtOH (150  $\mu\text{L}$ ) and Nafion 117 (5.4  $\mu\text{L}$ ) were sonicated for 30 min. 10  $\mu\text{L}$  of HAP ink was dropped on a  $2 \times 0.5 \text{ cm}^2$  of the cleaned ITO glass and dried at ambient condition.

**HAP loaded on glassy carbon electrode.** Glassy carbon rotating disk electrode (GC-RDE, diameter; 5 mm) was polished by 0.05  $\mu\text{m}$  alumina powder and sonicated 3 times using DI water for 20 sec and dried under Ar gas. 2  $\mu\text{L}$  of the same HAP ink was dropped on the polished GC-RDE and dried at ambient condition.

**HAP loaded on Ni-foam.** Ni-foam ( $2 \times 1 \text{ cm}^2$ ) was cleaned in 0.5 M of  $\text{H}_2\text{SO}_4$  solution with sonication for 5 min and washed 3 times in DI water. The cleaned Ni-foam was immersed in HAP synthesis solution as described above. Ni-foam containing solution mixture was transferred into a Teflon-lined autoclave reactor and maintained in a heating oven at 200 °C for 24 hr. After cooling the solution, HAP loaded on Ni-foam was rinsed using 100 mL of DI water.

**Electrodeposition of Cobalt-Calcium Phosphate Composite (CCPC) Film.** The working electrodes were HAP loaded on substrates (ITO glass, GC-RDE and Ni-foam). The Ag/AgCl and Pt-plate were used as the reference and counter electrode, respectively. Electrochemical cell held 50 mL of 20 mM of aqueous cobalt nitrate solution. Electrolysis was carried out at +1.103 V vs Ag/AgCl for 3 hours without stirring.

**Electrochemical Method.** All electrochemical experiments were carried out a three-electrode electrochemical cell system. The CCPC coated substrates were used as the working electrodes. Ag/AgCl (BASi, 3 M KCl) for pH 7, Hg/HgO (1.0 M KOH) for pH 14 and Pt-plate (area: 5 cm<sup>2</sup>, Watanatech) were applied as a reference and counter electrodes, respectively. Electrochemical experiments were conducted under ambient condition using commercial potentiostat (ZIVE SP1, Watanatech). The electrolytes were 0.1 M potassium phosphate buffer pH 7.0 (0.1 M KPi pH 7.0) for the CCPC coated on ITO or GC-RDE and 1.0 M KOH (pH 14) for the CCPC coated on Ni-foam. Potentials were converted to the normal hydrogen electrode (NHE) or reversible hydrogen electrode (RHE) using the following formula:  $E(\text{NHE}) = E(\text{Ag}/\text{AgCl}) + 0.197 \text{ (V)}$ ,  $E(\text{RHE}) = E(\text{NHE}) + 0.059 \text{ (V)} \times \text{pH}$ .

**Characterization.** The crystalline phases of HAP and the CCPC film on ITO were determined by the grazing incidence X-ray diffraction (GIXRD, Smartlab, Rigaku). The prepared CCPC film morphology was characterized by a TITAN G2 60-300 transmission electron microscopy (TEM) equipped with CETCOR corrector and 4-silicon drift detector system energy dispersive X-ray spectroscopy operating at an accelerating voltage of 80 kV. Field emission scanning electron microscopy (FE-SEM) were obtained with a S8000 (TESCAN). The CCPC film underwent elemental analysis using an inductively coupled plasma atomic emission spectrometer (ICP-AES, OPIMA 4300DV/5300DV, Perkin Elmer) to identify the elemental composition of cobalt, calcium and phosphorous. The XPS results were obtained on a PHI 5000 Versaprobe instrument (ULVAC-PHI Inc., Chigasaki, Japan) in which monochromated Al K $\alpha$  radiation ( $h\nu=1486.6 \text{ eV}$ ) was illuminated as the light source.

**Current-Voltage characteristic.** The CCPC coated on GC-RDE was scanned by applying the potential of 0 ~ 1.3 V vs Ag/AgCl at a scan rate of 5 mV/s in 0.1 M KPi (pH 7) at 900, 1600 and 2500 rpm with iR compensation (85 % of iR-drop was compensated by the potentiostat). The CCPC coated on Ni-foam was tested by applying potential of 0 ~ 0.8 V vs Hg/HgO at a scan rate of 5 mV/s in 1.0 M KOH (pH 14) without iR compensation.

**Durability Test of the CCPC film on ITO.** The potentials were tested under two conditions, 1.103 V and 1.303 V vs Ag/AgCl, in 0.1 M KPi buffer (pH 7) and the potentials were applied for 48 hr without iR compensation.

**Multi-step chronopotentiometric.** The multi-step chronopotentiometric of CCPC coated Ni-foam was proceeded in 1.0 M KOH (pH 14). The current density started at 5 mA/cm<sup>2</sup> and ended at 50 mA/cm<sup>2</sup>, with an increase of 5 mA/cm<sup>2</sup> per 20 min without iR compensation.

**Tafel plot.** Tafel slope was calculated by the data of linear sweep voltammetry (LSV) in 0.1 M KPi (pH 7) buffer and 1.0 M KOH (pH 14). The overpotential was calculated using the following equation.

$$\eta = \text{applied potential (V) vs NHE} - (1.23 \text{ V} - 0.059 \text{ V} \times (\text{pH } 7 \text{ or } 14))$$

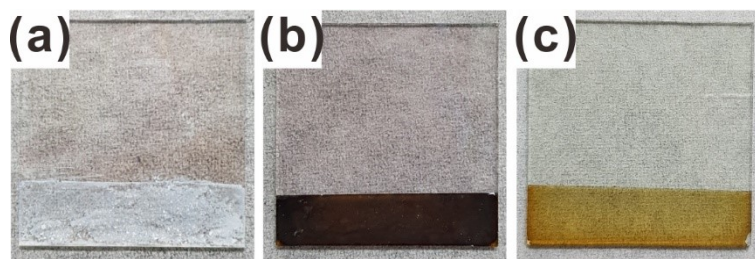

**Figure S1.** The photographs of the (a) HAP, (b) CCPC film, (c) electrodeposited  $\text{Co}^{2+}$  on bare ITO glass.

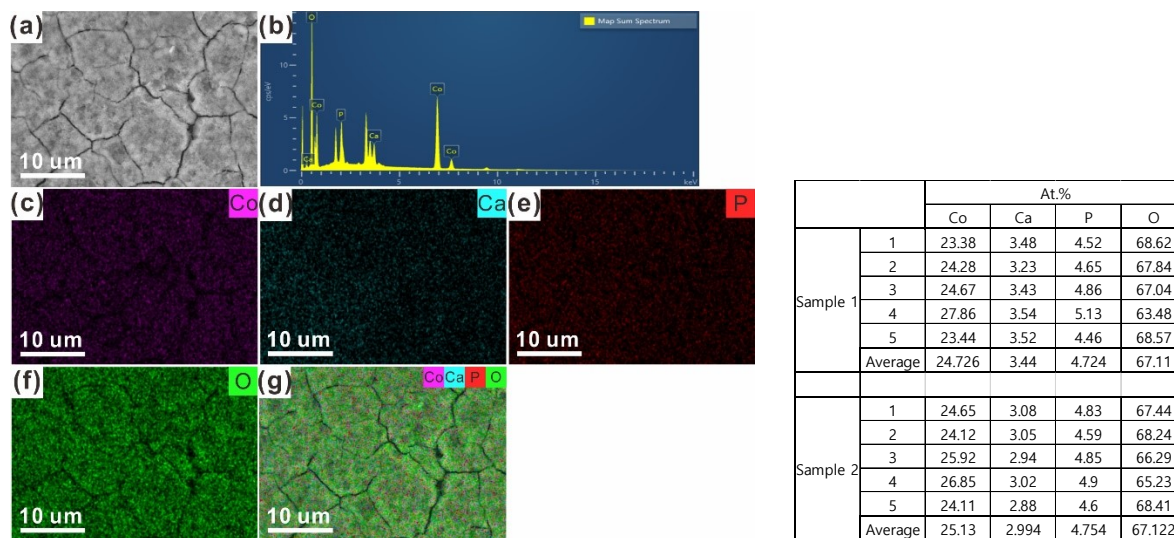

**Figure S2.** SEM-EDX elements mapping of the CCPC film (a) SEM image, (b) EDX spectroscopy, (c) Co, (d) Ca, (e) P, (f) O and (g) Overlapping of Co, Ca, P and O. The atomic % of Co, Ca, P and O of two CCPC films are listed on the table (right).

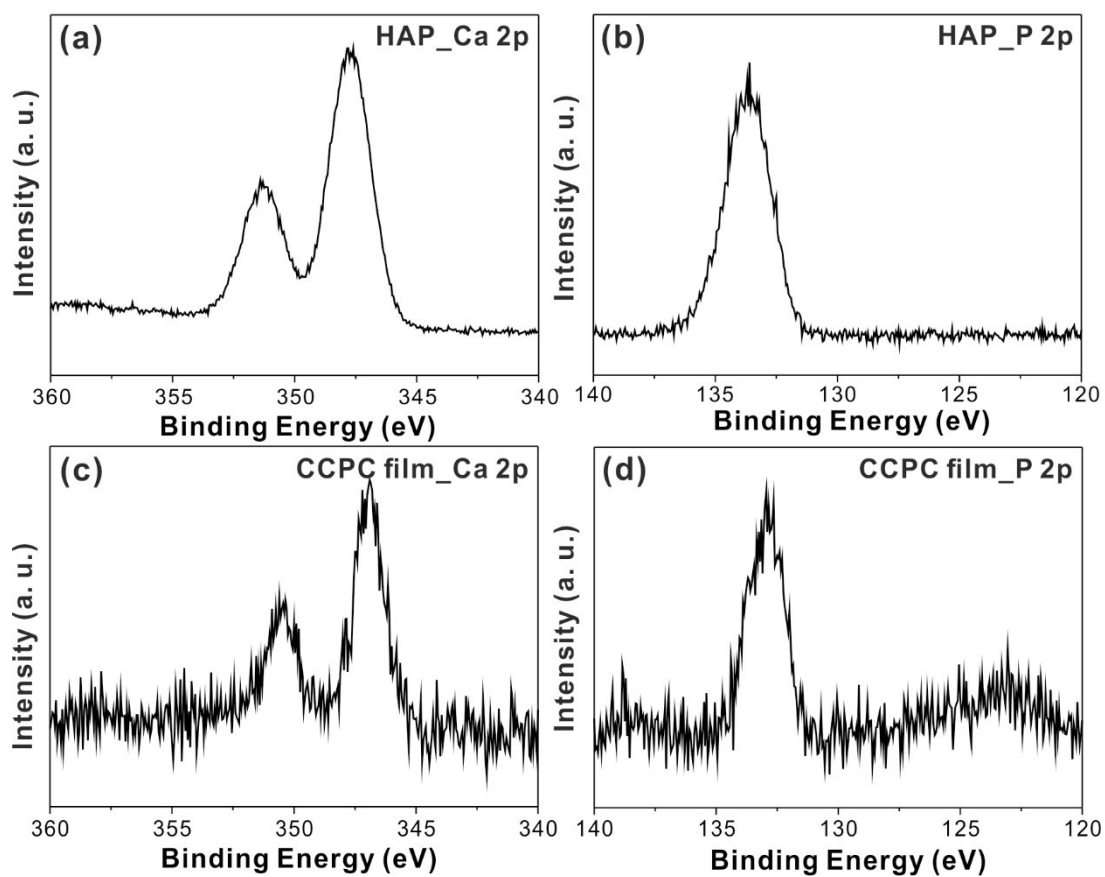

**Figure S3.** XPS spectra of (a and b) HAP and (c and d) CCPC film, (a and c) Ca 2p and (b and d) P 2p.

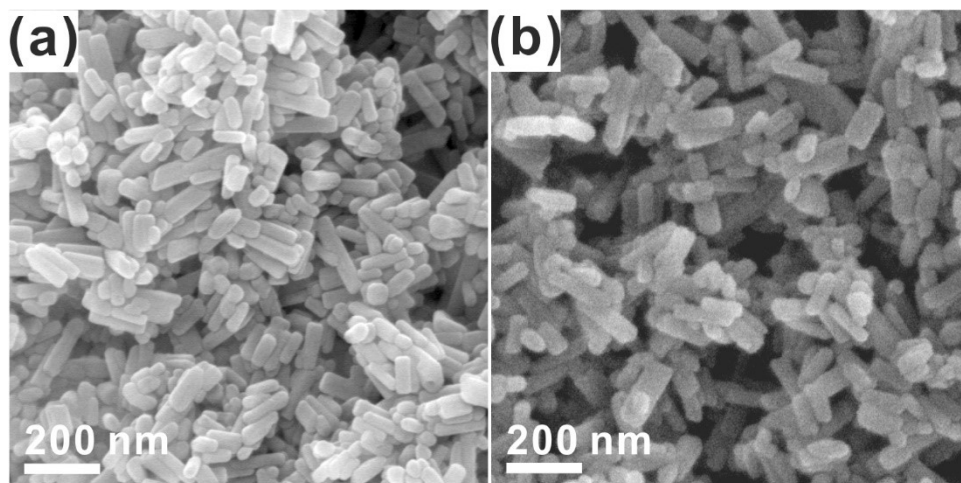

**Figure S4.** SEM images of (a) HAP and (b) HAP immersion into aqueous Co<sup>2+</sup> solution (20 mM) after 3 hr.



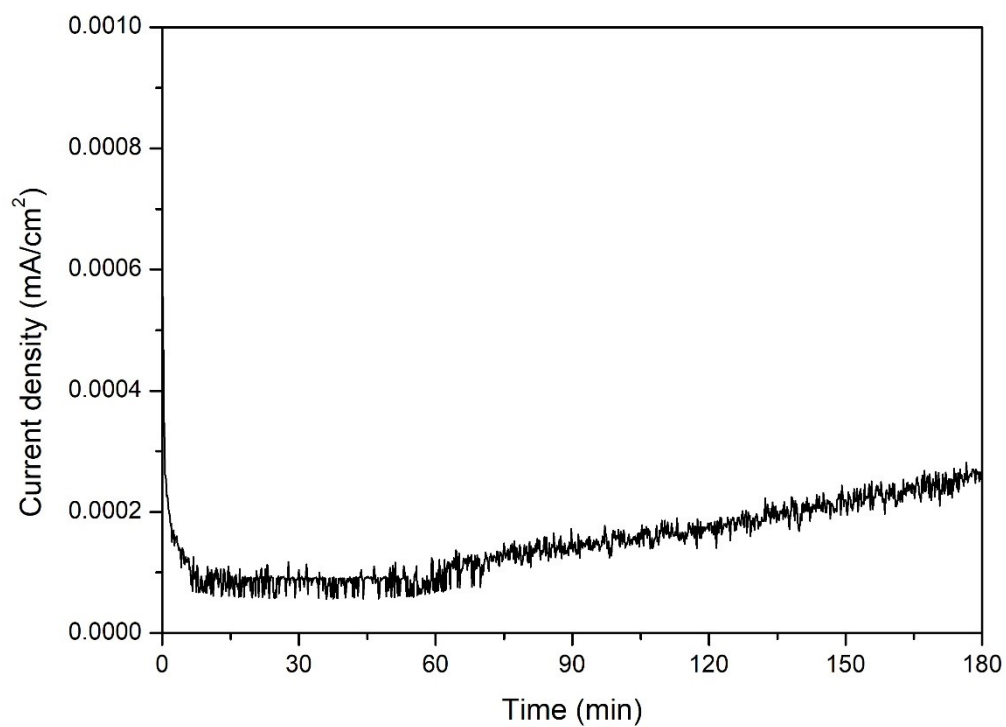

**Figure S5.** Current profile of HAP loaded on ITO glass in 20 mM NaNO<sub>3</sub> solution at +1.3 V vs NHE for 3 hours.

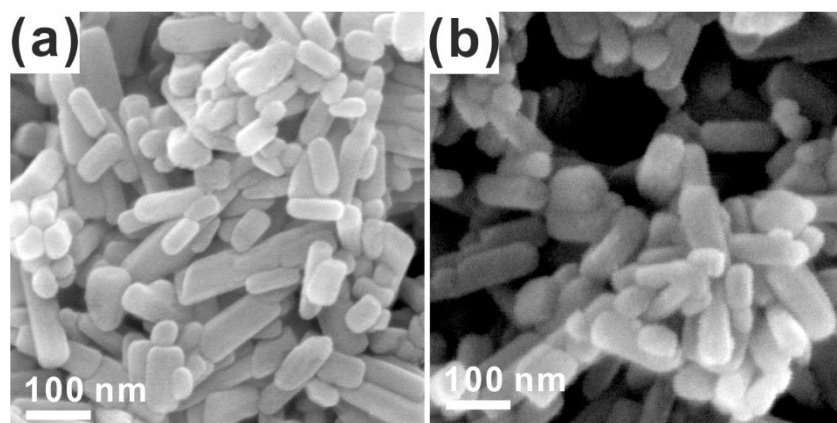

**Figure S6.** SEM images of (a) HAP and (b) HAP after anodic electrolysis at +1.3 V vs NHE in 20 mM NaNO<sub>3</sub> solution.

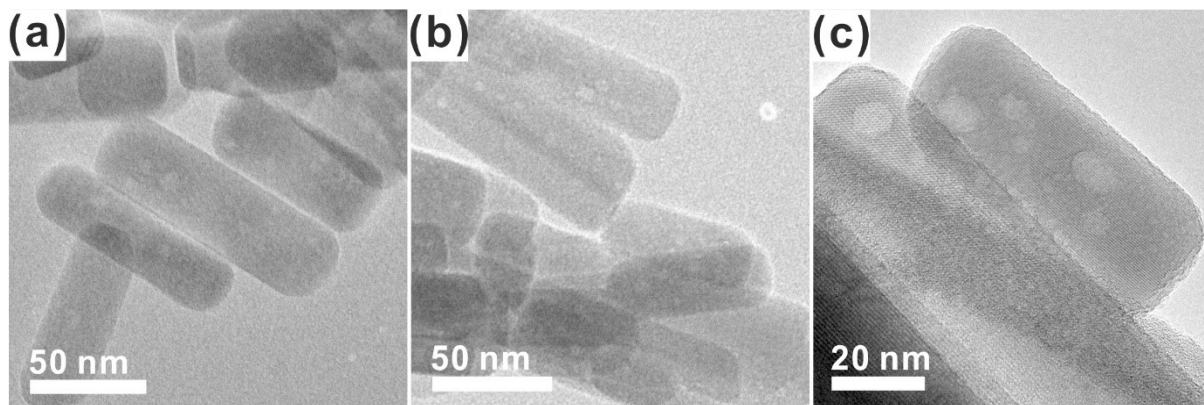

**Figure S7.** TEM images of (a) HAP, (b) Ag incorporated HAP and (c) Co incorporated HAP. By simple immersing of HAP into  $\text{Co}^{2+}$  solution (0.1 M) and  $\text{Ag}^+$  solution (0.1 M), no morphological change is observed (Fig. S7b and c).

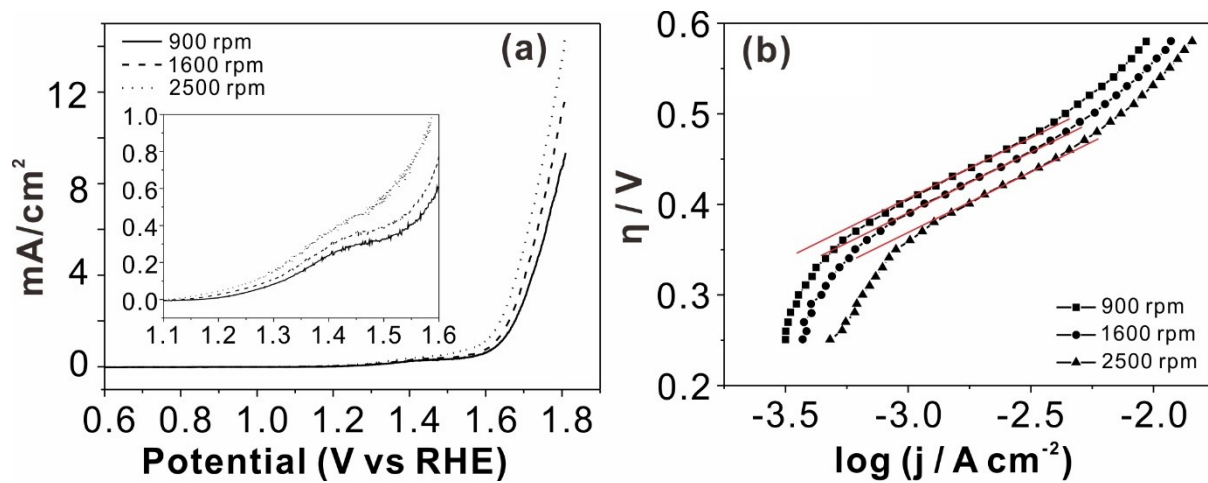

**Figure S8.** (a) Current-Voltage characteristic curves of CCPC film on GC-RDE (insert; cobalt oxidative wave) and (b) Tafel plots of CCPC film on GC-RDE at different rotating speeds.

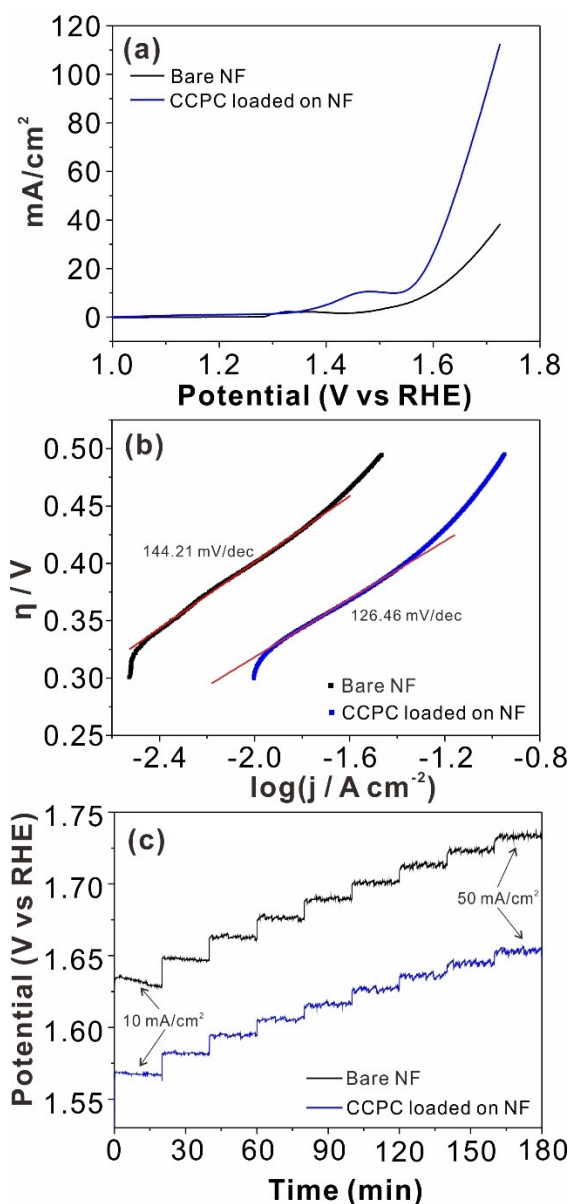

**Figure S9.** (a) Current-Voltage characteristic curves for bare Ni-foam and CCPC loaded on Ni-foam with a scan rate of  $5 \text{ mV}/\text{s}$  in  $1.0 \text{ M KOH}$  (pH 14) without  $iR$  compensation, (b) Corresponding Tafel plots for bare Ni-foam and CCPC loaded on Ni-foam, (c) Multi-current process of bare Ni-foam and CCPC loaded on Ni-foam in  $1.0 \text{ M KOH}$ . The current density started at  $5 \text{ mA}/\text{cm}^2$  and ended at  $50 \text{ mA}/\text{cm}^2$ , with an increment of  $5 \text{ mA}/\text{cm}^2$  per 20 min.

**Movie S1.** The entire process of in-situ formation of the CCPC film in 20 mM aqueous  $\text{Co}^{2+}$  solution at +1.3 V vs NHE for 90 min.

**Movie S2.** Bulk electrolysis of CCPC film on ITO at +1.91 V vs RHE in 0.1 M KPi buffer (pH 7) solution.
